# Supplementary material for: Theoretical studies on the quinoidal thiophene based dyes for dye sensitized solar cell and NLO applications
Source: Royal Society of Chemistry journal article supplement (doi:10.1039/c4cp02694b), 2014-01-01
Supplement: c4cp02694b1.pdf [file c4cp02694b1.pdf]

**Supplementary Information**

**Theoretical Studies on the Quinoidal Thiophene Based Dyes for Dye Sensitized Solar Cell  
and NLO applications**

**R. Nithya and K. Senthilkumar**

Department of Physics, Bharathiar University, Coimbatore, India-641 046.

\*Corresponding author: Fax No: +91-422-2422387, E-Mail: [ksenthil@buc.edu.in](mailto:ksenthil@buc.edu.in)

**Table S1** The absorption wavelength (in nm and eV) associated with HOMO → LUMO transition in QT1 dye molecule calculated at (a) different methods (b) in basis sets in acetonitrile medium.

(a)

| Method                | Transition | $\lambda_{\text{abs}}$ |      | $f$   |
|-----------------------|------------|------------------------|------|-------|
|                       |            | nm                     | eV   |       |
| B3LYP/6-311G(d,p)     | H→L        | 529                    | 2.34 | 1.375 |
| PBE0/6-311G(d,p)      | H→L        | 520                    | 2.38 | 1.420 |
| M06-2X/6-311G(d,p)    | H→L        | 505                    | 2.46 | 1.478 |
| M06-HF/6-311G(d,p)    | H→L        | 490                    | 2.53 | 1.525 |
| CAM-B3LYP/6-311G(d,p) | H→L        | 498                    | 2.49 | 1.489 |
| LC-BLYP/6-311G(d,p)   | H→L        | 472                    | 2.63 | 1.576 |
| BHandHLYP/6-311G(d,p) | H→L        | 483                    | 2.57 | 1.533 |

(b)

| Basis set      | Transition | $\lambda_{\text{abs}}$ |      | $f$   |
|----------------|------------|------------------------|------|-------|
|                |            | nm                     | eV   |       |
| 6-311+G(d,p)   | H→L        | 537                    | 2.31 | 1.389 |
| 6-311++G(d,p)  | H→L        | 537                    | 2.31 | 1.388 |
| 6-311G(2d, p)  | H→L        | 530                    | 2.34 | 1.369 |
| 6-311+G(2d,p)  | H→L        | 538                    | 2.30 | 1.383 |
| 6-311G(2d,2p)  | H→L        | 531                    | 2.34 | 1.369 |
| 6-311+G(2d,2p) | H→L        | 539                    | 2.30 | 1.382 |

Experimental absorption wavelength of QT1 molecule is **548 nm** in acetonitrile medium.

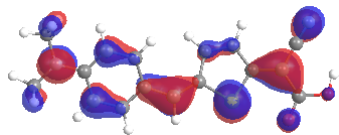

HOMO-1

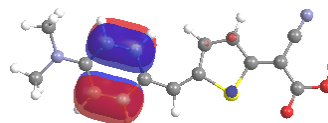

HOMO-2

QT1

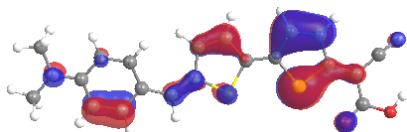

HOMO-3

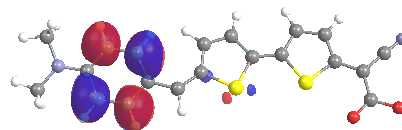

LUMO+2

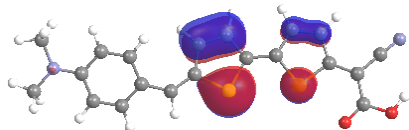

HOMO-5

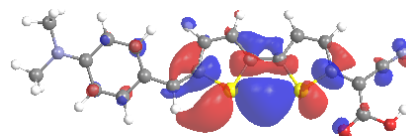

LUMO+3

QT2A

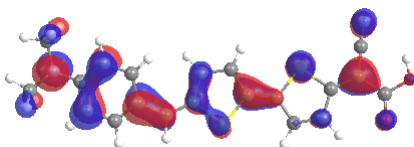

HOMO-1

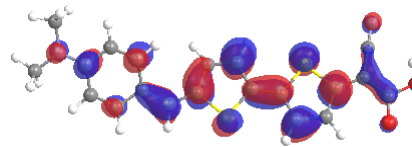

LUMO+1

QT2B

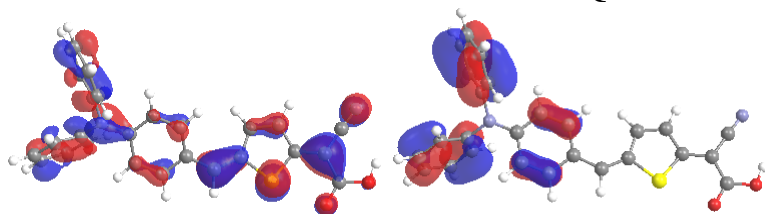

HOMO-1

HOMO-3

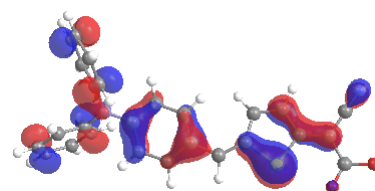

HOMO-4

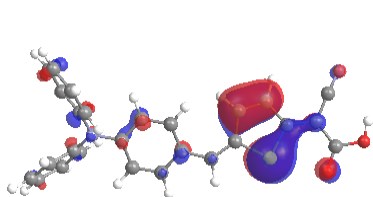

HOMO-7

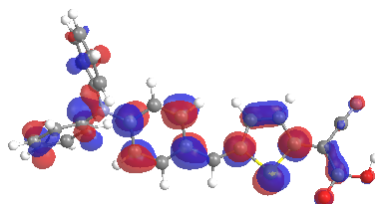

LUMO+1

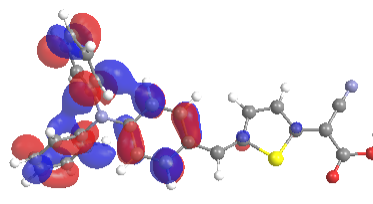

LUMO+2

QT3

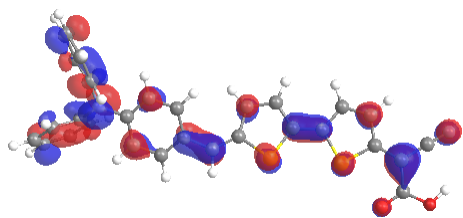

HOMO-1

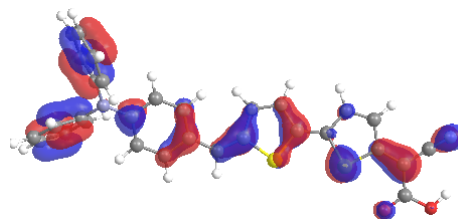

HOMO-2

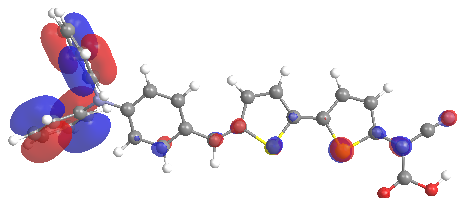

HOMO-3

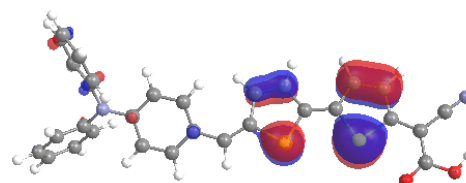

HOMO-5

**QT4A**

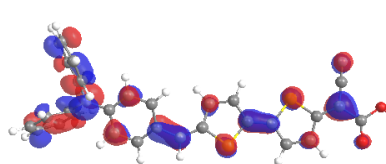

HOMO-1

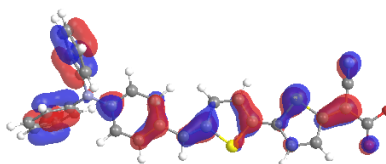

HOMO-2

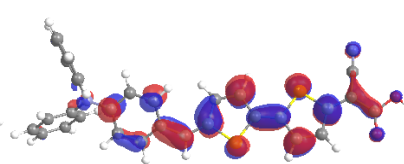

LUMO+1

**QT4B**

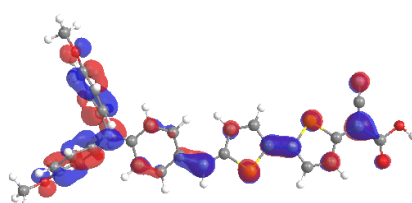

HOMO-1

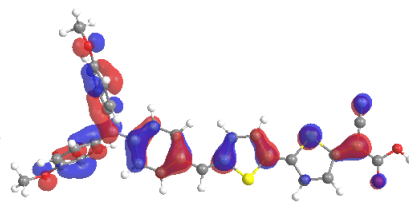

HOMO-3

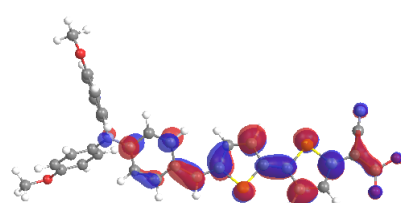

LUMO+1

**QT5**

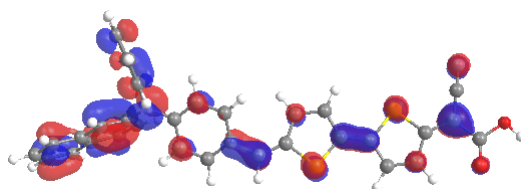

HOMO-1

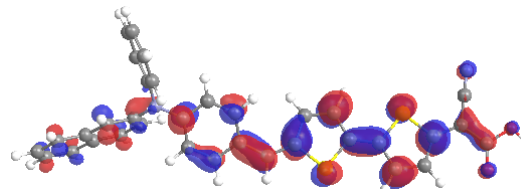

LUMO+1

**QT6**
